# Supplementary material for: The Nutritional Qualities of Walnuts and Their Planted Soils from China—Level and Relationship
Source: MDPI journal article supplement (doi:10.3390/f14071369), 2023-07-04
Supplement: s1 [file s1]

# Supplementary File

## Methods

### Determination of Fatty acid

Walnut oil (WO) was extracted from crushed walnuts kernels through solvent extraction. Fatty acid methyl esters (FAME) from the WO were obtained by alkaline treatment with 2.0 mol/L KOH in methanol. The FAMEs were analyzed using a 7890A Gas Chromatography equipped with a flame ionization detector (Agilent Technologies, Santa Clara, CA, USA). The GC analysis was carried out using an HP-INNOWax fused silica capillary column (30 m × 0.25 mm × 0.25 μm). The detailed operation conditions were as follows: He as carrier gas, the injector temperature at 220°C, split ratio 1:100, and detector temperature 275°C. The column was held for 1 min at 140°C and then programmed at 4°C/min to 250°C.

### Determination of tocopherol

The analysis procedure was as follows: approximately 0.3 g of oil was dissolved in 5 mL of n-hexane and vortexed for 30 s. The mixture was filtered through a 0.45 μm nylon filter, and vitamin E was analyzed using high-performance liquid chromatography (HPLC) (Agilent Technologies, Palo Alto, CA, USA) and a Prodigy ODS-2 column (2150 mm, 5 μm).

### Determination of mineral elements

Potassium (K), Calcium (Ca), Phosphorus (P), Magnesium (Mg), Copper (Cu), Zinc (Zn), Iron (Fe), Sodium (Na), Manganese (Mn), Boron (B), Molybdenum (Mo), Nickel (Ni), Cadmium (Cr), Cobalt (Co), Selenium (Se), Vanadium (V), were determined by ICP-OES (iCAP 7000); Briefly, 0.2 g milled samples were accurately weighted and transferred to polytetrafluoroethylene (PTFE) tube, then added 6 mL nitric acid (HNO<sub>3</sub>) and 2 mL hydrogen peroxide (H<sub>2</sub>O<sub>2</sub>). The PTFE tube was heated gradually to 200 °C for 20 min with the microwave oven (CEM, Matthews, NC, USA). After cooling at the room temperature, the PTFE tube was placed into digestion furnace and the solution was heated to near dryness at 200 °C. Then the solution diluted to 25 mL polypropylene tubes for ICP-OES analysis.

### Determination of amino acids

Walnut flour (0.1 g) were accurately weighted and hydrolyzed with 10 of mL HCl (6 m) at 105 °C for 24 h under a nitrogen atmosphere. After hydrolysis, the hydrolysate was analyzed by an amino acid automatic analysis apparatus (L-8900, Hitachi High Technologies Corporation, Tokyo, Japan) after precolumn derivatization with O-phthaldialdehyde (OPA) or 9-fluorenylmethyl chloroformate (Fmoc).

### Figure and Table

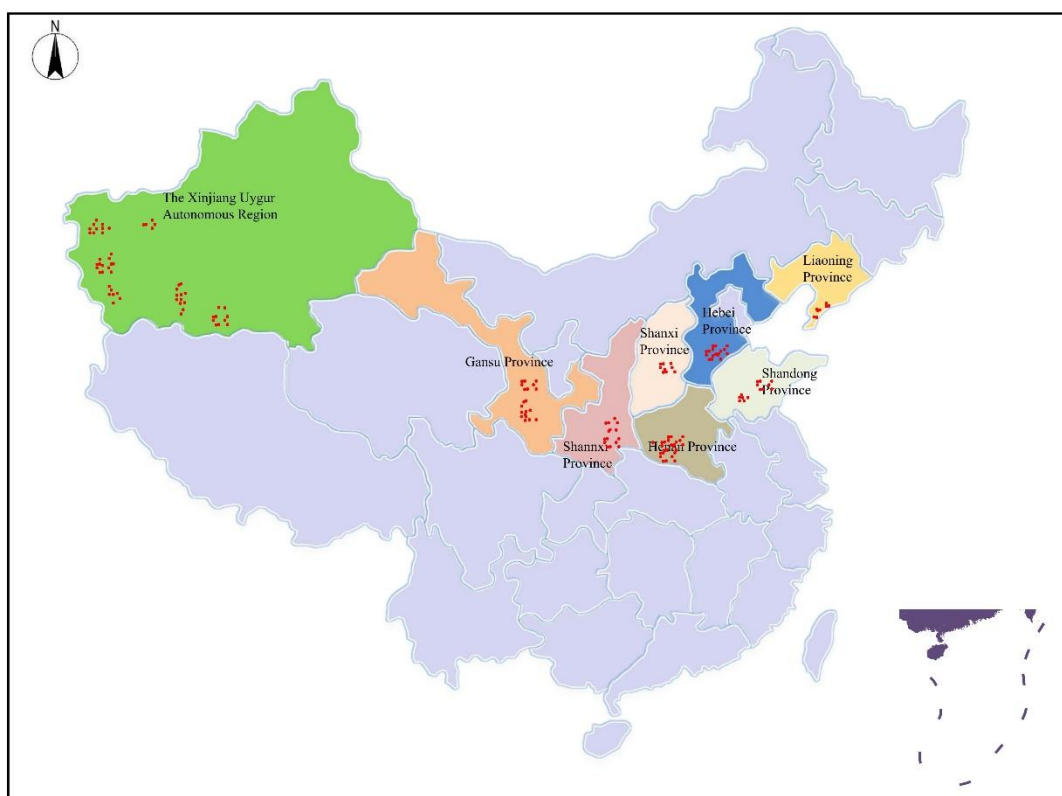

**Figure S1. Geographical location of walnut sample collection sites in eight provinces**

**Table S1 Information on where soil samples were collected**

| Province | Sample size | Latitude       | Longitude        |
|----------|-------------|----------------|------------------|
| Xinjiang | 55          | 37°44'-38°85'N | 77°31'-114°39'E  |
| Shanxi   | 26          | 36°40'-38°06'N | 111°25'-114°05'E |
| Shandong | 20          | 36°55'-37°17'N | 117°32'-118°31'E |
| Hebei    | 48          | 36°01'-42°37'N | 113°04'-119°53'E |
| Liaoning | 20          | 38°43'-43°26'N | 118°53'-125°46'E |
| Shaanxi  | 39          | 33°39'-34°45'N | 107°40'-109°49'E |
| Henan    | 28          | 31°23'-36°22'N | 110°21'-116°39'E |
| Gansu    | 37          | 32°31'-42°57'N | 92°13'-108°46'E  |

Note: “N” is for North, “E” is for East, “m” is for metres

**Table S2 Comparison of the mineral composition in walnut flour from eight provinces.**

|               | Province | Shaanxi     | Shanxi    | Xinjiang    | Henan       | Hebei       | Liaoning    | Gansu       | Shandong   |
|---------------|----------|-------------|-----------|-------------|-------------|-------------|-------------|-------------|------------|
| Macroelements | N        | 37          | 26        | 55          | 28          | 48          | 20          | 39          | 20         |
|               | Ca       | 1350.29±2   | 1208.16±2 | 1060.02±2   | 1590.61±2   | 1503.72±1   | 1419.17±1   | 1139.46±3   | 1363.98±1  |
|               |          | 74.11       | 66.20     | 11.53       | 05.61       | 94.15       | 70.63       | 24.99       | 35.37      |
|               | Mg       | 1502.92±1   | 1694.72±2 | 1699.09±1   | 1786.94±1   | 1481.32±1   | 1570.71±1   | 1710.16±8   | 1688.79±1  |
|               |          | 16.07       | 13.61     | 22.08       | 33.62       | 17.13       | 14.71       | 9.86        | 00.84      |
|               | K        | 3965.76±3   | 3739.53±4 | 4401.22±5   | 3746.60±3   | 3455.30±3   | 3656.79±7   | 4572.05±6   | 3659.96±9  |
|               |          | 96.82       | 71.86     | 08.97       | 65.94       | 19.21       | 44.39       | 68.76       | 1.40       |
|               | P        | 3189.16±3   | 3674.34±6 | 3043.44±4   | 3480.23±2   | 3084.74±4   | 3793.19±3   | 3483.22±6   | 3684.06±5  |
|               |          | 18.41       | 56.83     | 17.49       | 34.85       | 03.48       | 98.90       | 03.69       | 48.44      |
|               | Na       | 8.35±3.98   | 12.51±6.8 | 14.45±9.2   | 5.57±2.38   | 8.71±3.88   | 14.18±8.6   | 13.99±9.9   | 15.34±5.1  |
|               |          |             | 5         | 5           |             |             | 8           | 5           | 9          |
|               | Mn       | 35.50±16.01 | 42.79±9.8 | 33.13±10.58 | 33.94±12.36 | 52.53±23.89 | 54.39±30.51 | 47.16±40.31 | 45.59±9.93 |
| Microelements | Fe       | 23.99±6.4   | 43.28±8.9 | 29.43±8.2   | 34.35±6.8   | 32.28±11.1  | 42.25±12.1  | 29.77±6.2   | 43.40±11.1 |
|               |          | 4           | 0         | 2           | 9           | 90          | 59          | 4           | 14         |
|               | Cu       | 15.68±1.9   | 14.47±2.6 | 17.72±3.5   | 11.03±2.0   | 14.37±2.7   | 15.26±2.0   | 17.04±2.8   | 12.79±2.9  |
|               |          | 9           | 1         | 6           | 9           | 3           | 9           | 7           | 4          |
|               | Zn       | 17.63±3.7   | 23.44±3.8 | 23.13±6.1   | 24.45±4.3   | 21.33±4.4   | 31.46±3.3   | 19.32±3.6   | 21.78±6.5  |
|               |          | 6           | 2         | 3           | 3           | 4           | 3           | 1           | 1          |
|               | B        | 11.28±3.9   | 14.41±2.6 | 11.49±2.7   | 12.96±1.3   | 8.77±1.97   | 13.05±2.4   | 12.91±3.1   | 9.31±3.06  |
|               |          | 9           | 7         | 4           | 8           |             | 8           | 3           |            |
|               | Mo       | 0.27±0.13   | 0.15±0.09 | 0.61±0.17   | 0.27±0.07   | 0.15±0.06   | 0.11±0.05   | 0.33±0.15   | 0.37±0.06  |
|               | Ni       | 1.42±0.54   | 1.11±0.28 | 1.96±0.59   | 1.24±0.43   | 1.23±0.78   | 1.93±0.55   | 2.09±1.09   | 1.14±0.13  |
|               | Cr       | 0.32±0.14   | 0.36±0.08 | 0.39±0.13   | 0.37±0.09   | 0.32±0.13   | 0.32±0.04   | 0.42±0.17   | 0.35±0.05  |
|               | Co       | 0.07±0.02   | 0.09±0.04 | 0.08±0.03   | 0.11±0.04   | 0.10±0.04   | 0.13±0.04   | 0.09±0.04   | 0.11±0.03  |
|               | Se       | 0.02±0.01   | 0.03±0.02 | 0.06±0.02   | 0.04±0.01   | 0.04±0.01   | 0.03±0.01   | 0.03±0.02   | 0.06±0.01  |
|               | V        | 0.01±0.01   | 0.02±0.01 | 0.01±0.01   | 0.02±0.01   | 0.01±0.01   | 0.02±0.01   | 0.01±0.01   | 0.03±0.01  |

**Table S3. Correlation among the nutritional components of walnuts****(a). Correlation values**

| r Value    | Tocopherol | C16:0 | C18:0 | C18:1 | C18:2 | C18:3 |
|------------|------------|-------|-------|-------|-------|-------|
| Tocopherol | 1.00       | 0.22  | 0.03  | 0.07  | -0.06 | 0.06  |
| C16:0      | 0.22       | 1.00  | -0.10 | -0.12 | 0.14  | 0.14  |
| C18:0      | 0.03       | -0.10 | 1.00  | -0.18 | 0.16  | -0.07 |
| C18:1      | 0.07       | -0.12 | -0.18 | 1.00  | -0.54 | -0.31 |
| C18:2      | -0.06      | 0.14  | 0.16  | -0.54 | 1.00  | 0.11  |
| C18:3      | 0.06       | 0.14  | -0.07 | -0.31 | 0.11  | 1.00  |
| SFA        | -0.18      | 0.05  | -0.06 | -0.01 | 0.01  | -0.02 |
| MUFA       | -0.18      | -0.04 | -0.12 | 0.20  | -0.14 | -0.03 |
| Ca         | -0.28      | -0.22 | 0.34  | -0.15 | 0.24  | -0.16 |
| K          | -0.17      | 0.07  | -0.28 | -0.09 | 0.11  | 0.12  |
| Mg         | 0.12       | 0.12  | -0.13 | -0.08 | 0.15  | 0.16  |
| Na         | 0.45       | 0.36  | -0.10 | -0.02 | -0.06 | 0.20  |
| P          | 0.46       | 0.29  | 0.07  | 0.01  | 0.02  | 0.05  |
| B          | 0.54       | 0.12  | -0.15 | 0.16  | -0.05 | -0.14 |
| Mn         | 0.43       | 0.12  | 0.07  | 0.11  | -0.03 | -0.15 |
| Fe         | 0.69       | 0.14  | 0.26  | 0.04  | 0.02  | -0.03 |
| Cu         | -0.02      | 0.10  | -0.12 | 0.19  | -0.10 | -0.11 |
| Zn         | 0.35       | 0.20  | 0.28  | 0.04  | -0.04 | 0.03  |
| Mo         | -0.21      | 0.22  | -0.22 | 0.01  | 0.02  | 0.19  |
| Ni         | 0.21       | 0.19  | 0.00  | 0.07  | -0.03 | -0.04 |
| Cr         | -0.06      | -0.16 | 0.03  | -0.01 | 0.09  | -0.06 |
| Co         | 0.02       | -0.05 | 0.25  | -0.10 | 0.09  | -0.17 |
| Se         | -0.07      | 0.13  | -0.05 | 0.02  | 0.04  | 0.02  |
| V          | 0.24       | -0.10 | 0.13  | -0.11 | 0.13  | 0.03  |
| Asp        | -0.74      | -0.31 | -0.11 | -0.14 | 0.21  | -0.15 |
| Ser        | -0.75      | -0.30 | -0.11 | -0.14 | 0.19  | -0.16 |
| Glu        | -0.75      | -0.29 | -0.12 | -0.14 | 0.20  | -0.15 |
| Gly        | -0.76      | -0.30 | -0.11 | -0.15 | 0.19  | -0.14 |
| Ala        | -0.74      | -0.29 | -0.11 | -0.15 | 0.21  | -0.16 |
| Cys        | -0.39      | -0.18 | -0.01 | -0.12 | 0.26  | -0.06 |
| Tyr        | -0.75      | -0.26 | -0.12 | -0.14 | 0.19  | -0.14 |
| His        | -0.74      | -0.30 | -0.11 | -0.15 | 0.21  | -0.16 |
| Arg        | -0.72      | -0.31 | -0.11 | -0.14 | 0.21  | -0.16 |
| Pro        | -0.79      | -0.30 | -0.11 | -0.13 | 0.17  | -0.17 |
| Thr        | -0.72      | -0.31 | -0.12 | -0.14 | 0.22  | -0.15 |
| Val        | -0.71      | -0.31 | -0.11 | -0.14 | 0.21  | -0.17 |
| Met        | -0.70      | -0.32 | -0.09 | -0.16 | 0.23  | -0.15 |
| Ile        | -0.77      | -0.33 | -0.09 | -0.15 | 0.19  | -0.15 |
| Leu        | -0.73      | -0.33 | -0.09 | -0.15 | 0.21  | -0.15 |
| Phe        | -0.73      | -0.30 | -0.11 | -0.13 | 0.21  | -0.16 |
| Lys        | -0.74      | -0.29 | -0.11 | -0.13 | 0.19  | -0.14 |

(a). Correlation values

| r Value    | SFA   | MUFA  | Ca    | K     | Mg    | Na    |
|------------|-------|-------|-------|-------|-------|-------|
| Tocopherol | -0.18 | -0.18 | -0.28 | -0.17 | 0.12  | 0.45  |
| C16:0      | 0.05  | -0.04 | -0.22 | 0.07  | 0.12  | 0.36  |
| C18:0      | -0.06 | -0.12 | 0.34  | -0.28 | -0.13 | -0.10 |
| C18:1      | -0.01 | 0.20  | -0.15 | -0.09 | -0.08 | -0.02 |
| C18:2      | 0.01  | -0.14 | 0.24  | 0.11  | 0.15  | -0.06 |
| C18:3      | -0.02 | -0.03 | -0.16 | 0.12  | 0.16  | 0.20  |
| SFA        | 1.00  | 0.90  | 0.00  | -0.01 | -0.17 | -0.19 |
| MUFA       | 0.90  | 1.00  | -0.03 | 0.02  | -0.17 | -0.17 |
| Ca         | 0.00  | -0.03 | 1.00  | -0.13 | -0.18 | -0.40 |
| K          | -0.01 | 0.02  | -0.13 | 1.00  | 0.39  | 0.02  |
| Mg         | -0.17 | -0.17 | -0.18 | 0.39  | 1.00  | 0.19  |
| Na         | -0.19 | -0.17 | -0.40 | 0.02  | 0.19  | 1.00  |
| P          | -0.19 | -0.15 | -0.07 | 0.04  | 0.51  | 0.46  |
| B          | -0.20 | -0.18 | -0.17 | 0.15  | 0.33  | 0.20  |
| Mn         | -0.10 | -0.09 | 0.10  | -0.06 | -0.08 | 0.06  |
| Fe         | -0.14 | -0.18 | 0.05  | -0.45 | -0.04 | 0.20  |
| Cu         | 0.06  | 0.13  | -0.24 | 0.48  | 0.10  | 0.08  |
| Zn         | -0.28 | -0.21 | 0.04  | -0.17 | 0.21  | 0.35  |
| Mo         | -0.03 | -0.04 | -0.24 | 0.53  | 0.29  | 0.21  |
| Ni         | -0.06 | 0.01  | -0.21 | 0.34  | 0.18  | 0.20  |
| Cr         | -0.01 | -0.02 | 0.01  | 0.07  | 0.05  | -0.17 |
| Co         | -0.12 | -0.15 | 0.32  | 0.01  | 0.08  | -0.12 |
| Se         | -0.09 | -0.12 | -0.02 | 0.16  | 0.17  | 0.13  |
| V          | -0.19 | -0.20 | 0.15  | -0.07 | 0.23  | 0.00  |
| Asp        | 0.10  | 0.07  | 0.34  | 0.34  | 0.08  | -0.60 |
| Ser        | 0.13  | 0.10  | 0.36  | 0.31  | 0.05  | -0.61 |
| Glu        | 0.11  | 0.08  | 0.34  | 0.34  | 0.08  | -0.60 |
| Gly        | 0.13  | 0.09  | 0.34  | 0.33  | 0.06  | -0.61 |
| Ala        | 0.11  | 0.07  | 0.35  | 0.33  | 0.08  | -0.60 |
| Cys        | -0.21 | -0.19 | 0.15  | 0.42  | 0.45  | -0.28 |
| Tyr        | 0.11  | 0.07  | 0.30  | 0.38  | 0.08  | -0.57 |
| His        | 0.11  | 0.07  | 0.35  | 0.34  | 0.08  | -0.60 |
| Arg        | 0.11  | 0.07  | 0.35  | 0.34  | 0.09  | -0.60 |
| Pro        | 0.16  | 0.12  | 0.36  | 0.29  | 0.02  | -0.61 |
| Thr        | 0.06  | 0.04  | 0.32  | 0.37  | 0.12  | -0.58 |
| Val        | 0.13  | 0.07  | 0.36  | 0.29  | 0.02  | -0.64 |
| Met        | 0.10  | 0.06  | 0.38  | 0.30  | 0.11  | -0.60 |
| Ile        | 0.17  | 0.13  | 0.40  | 0.25  | 0.02  | -0.64 |
| Leu        | 0.11  | 0.08  | 0.39  | 0.28  | 0.07  | -0.62 |
| Phe        | 0.09  | 0.06  | 0.33  | 0.37  | 0.10  | -0.60 |
| Lys        | 0.08  | 0.05  | 0.32  | 0.40  | 0.09  | -0.60 |

(a). Correlation values

| r Value    | P     | B     | Mn    | Fe    | Cu    | Zn    |
|------------|-------|-------|-------|-------|-------|-------|
| Tocopherol | 0.46  | 0.54  | 0.43  | 0.69  | -0.02 | 0.35  |
| C16:0      | 0.29  | 0.12  | 0.12  | 0.14  | 0.10  | 0.20  |
| C18:0      | 0.07  | -0.15 | 0.07  | 0.26  | -0.12 | 0.28  |
| C18:1      | 0.01  | 0.16  | 0.11  | 0.04  | 0.19  | 0.04  |
| C18:2      | 0.02  | -0.05 | -0.03 | 0.02  | -0.10 | -0.04 |
| C18:3      | 0.05  | -0.14 | -0.15 | -0.03 | -0.11 | 0.03  |
| SFA        | -0.19 | -0.20 | -0.10 | -0.14 | 0.06  | -0.28 |
| MUFA       | -0.15 | -0.18 | -0.09 | -0.18 | 0.13  | -0.21 |
| Ca         | -0.07 | -0.17 | 0.10  | 0.05  | -0.24 | 0.04  |
| K          | 0.04  | 0.15  | -0.06 | -0.45 | 0.48  | -0.17 |
| Mg         | 0.51  | 0.33  | -0.08 | -0.04 | 0.10  | 0.21  |
| Na         | 0.46  | 0.20  | 0.06  | 0.20  | 0.08  | 0.35  |
| P          | 1.00  | 0.41  | 0.22  | 0.36  | 0.04  | 0.60  |
| B          | 0.41  | 1.00  | 0.27  | 0.38  | 0.03  | 0.20  |
| Mn         | 0.22  | 0.27  | 1.00  | 0.27  | 0.04  | 0.16  |
| Fe         | 0.36  | 0.38  | 0.27  | 1.00  | -0.19 | 0.49  |
| Cu         | 0.04  | 0.03  | 0.04  | -0.19 | 1.00  | 0.18  |
| Zn         | 0.60  | 0.20  | 0.16  | 0.49  | 0.18  | 1.00  |
| Mo         | -0.12 | 0.01  | -0.30 | -0.31 | 0.36  | -0.09 |
| Ni         | 0.17  | 0.26  | 0.44  | 0.01  | 0.41  | 0.23  |
| Cr         | -0.08 | -0.02 | -0.17 | 0.01  | -0.02 | -0.12 |
| Co         | 0.09  | 0.11  | 0.45  | 0.17  | 0.08  | 0.35  |
| Se         | -0.04 | -0.02 | -0.18 | -0.06 | 0.15  | 0.15  |
| V          | 0.31  | 0.27  | -0.09 | 0.44  | -0.26 | 0.29  |
| Asp        | -0.42 | -0.22 | -0.24 | -0.60 | -0.04 | -0.42 |
| Ser        | -0.43 | -0.25 | -0.23 | -0.62 | -0.04 | -0.42 |
| Glu        | -0.42 | -0.24 | -0.25 | -0.62 | -0.03 | -0.41 |
| Gly        | -0.45 | -0.25 | -0.25 | -0.61 | -0.04 | -0.42 |
| Ala        | -0.42 | -0.22 | -0.25 | -0.60 | -0.06 | -0.41 |
| Cys        | 0.09  | 0.10  | -0.23 | -0.34 | 0.00  | 0.03  |
| Tyr        | -0.44 | -0.24 | -0.26 | -0.64 | 0.01  | -0.44 |
| His        | -0.43 | -0.21 | -0.24 | -0.60 | -0.04 | -0.42 |
| Arg        | -0.41 | -0.19 | -0.24 | -0.59 | -0.04 | -0.42 |
| Pro        | -0.45 | -0.29 | -0.25 | -0.64 | -0.04 | -0.42 |
| Thr        | -0.40 | -0.19 | -0.25 | -0.60 | -0.03 | -0.40 |
| Val        | -0.51 | -0.22 | -0.23 | -0.54 | -0.08 | -0.48 |
| Met        | -0.38 | -0.17 | -0.24 | -0.53 | -0.11 | -0.39 |
| Ile        | -0.46 | -0.28 | -0.25 | -0.60 | -0.10 | -0.43 |
| Leu        | -0.41 | -0.22 | -0.23 | -0.56 | -0.11 | -0.39 |
| Phe        | -0.42 | -0.20 | -0.25 | -0.61 | -0.02 | -0.42 |
| Lys        | -0.45 | -0.21 | -0.25 | -0.62 | -0.01 | -0.43 |

(a). Correlation values

| r Value    | Mo    | Ni    | Cr    | Co    | Se    | V     |
|------------|-------|-------|-------|-------|-------|-------|
| Tocopherol | -0.21 | 0.21  | -0.06 | 0.02  | -0.07 | 0.24  |
| C16:0      | 0.22  | 0.19  | -0.16 | -0.05 | 0.13  | -0.10 |
| C18:0      | -0.22 | 0.00  | 0.03  | 0.25  | -0.05 | 0.13  |
| C18:1      | 0.01  | 0.07  | -0.01 | -0.10 | 0.02  | -0.11 |
| C18:2      | 0.02  | -0.03 | 0.09  | 0.09  | 0.04  | 0.13  |
| C18:3      | 0.19  | -0.04 | -0.06 | -0.17 | 0.02  | 0.03  |
| SFA        | -0.03 | -0.06 | -0.01 | -0.12 | -0.09 | -0.19 |
| MUFA       | -0.04 | 0.01  | -0.02 | -0.15 | -0.12 | -0.20 |
| Ca         | -0.24 | -0.21 | 0.01  | 0.32  | -0.02 | 0.15  |
| K          | 0.53  | 0.34  | 0.07  | 0.01  | 0.16  | -0.07 |
| Mg         | 0.29  | 0.18  | 0.05  | 0.08  | 0.17  | 0.23  |
| Na         | 0.21  | 0.20  | -0.17 | -0.12 | 0.13  | 0.00  |
| P          | -0.12 | 0.17  | -0.08 | 0.09  | -0.04 | 0.31  |
| B          | 0.01  | 0.26  | -0.02 | 0.11  | -0.02 | 0.27  |
| Mn         | -0.30 | 0.44  | -0.17 | 0.45  | -0.18 | -0.09 |
| Fe         | -0.31 | 0.01  | 0.01  | 0.17  | -0.06 | 0.44  |
| Cu         | 0.36  | 0.41  | -0.02 | 0.08  | 0.15  | -0.26 |
| Zn         | -0.09 | 0.23  | -0.12 | 0.35  | 0.15  | 0.29  |
| Mo         | 1.00  | 0.21  | 0.07  | -0.13 | 0.51  | -0.10 |
| Ni         | 0.21  | 1.00  | -0.03 | 0.39  | 0.09  | -0.13 |
| Cr         | 0.07  | -0.03 | 1.00  | -0.08 | -0.03 | 0.32  |
| Co         | -0.13 | 0.39  | -0.08 | 1.00  | 0.03  | 0.18  |
| Se         | 0.51  | 0.09  | -0.03 | 0.03  | 1.00  | 0.02  |
| V          | -0.10 | -0.13 | 0.32  | 0.18  | 0.02  | 1.00  |
| Asp        | 0.20  | -0.08 | 0.20  | 0.12  | 0.06  | -0.03 |
| Ser        | 0.16  | -0.09 | 0.18  | 0.12  | 0.04  | -0.06 |
| Glu        | 0.20  | -0.06 | 0.19  | 0.12  | 0.06  | -0.05 |
| Gly        | 0.19  | -0.08 | 0.19  | 0.12  | 0.05  | -0.05 |
| Ala        | 0.20  | -0.08 | 0.20  | 0.13  | 0.06  | -0.02 |
| Cys        | 0.31  | 0.08  | 0.30  | 0.15  | 0.15  | 0.25  |
| Tyr        | 0.26  | -0.05 | 0.20  | 0.09  | 0.09  | -0.08 |
| His        | 0.21  | -0.06 | 0.20  | 0.13  | 0.06  | -0.02 |
| Arg        | 0.21  | -0.07 | 0.20  | 0.12  | 0.06  | -0.01 |
| Pro        | 0.15  | -0.10 | 0.12  | 0.13  | 0.03  | -0.09 |
| Thr        | 0.24  | -0.05 | 0.23  | 0.11  | 0.08  | -0.01 |
| Val        | 0.21  | -0.10 | 0.20  | 0.11  | 0.06  | -0.01 |
| Met        | 0.18  | -0.09 | 0.23  | 0.13  | 0.04  | 0.05  |
| Ile        | 0.12  | -0.14 | 0.17  | 0.12  | 0.01  | -0.04 |
| Leu        | 0.14  | -0.11 | 0.19  | 0.14  | 0.03  | 0.01  |
| Phe        | 0.24  | -0.06 | 0.22  | 0.11  | 0.08  | -0.03 |
| Lys        | 0.27  | -0.04 | 0.22  | 0.12  | 0.09  | -0.02 |



(a). Correlation values

| r Value    | Asp   | Ser   | Glu   | Gly   | Ala   | Cys   |
|------------|-------|-------|-------|-------|-------|-------|
| Tocopherol | -0.74 | -0.75 | -0.75 | -0.76 | -0.74 | -0.39 |
| C16:0      | -0.31 | -0.30 | -0.29 | -0.30 | -0.29 | -0.18 |
| C18:0      | -0.11 | -0.11 | -0.12 | -0.11 | -0.11 | -0.01 |
| C18:1      | -0.14 | -0.14 | -0.14 | -0.15 | -0.15 | -0.12 |
| C18:2      | 0.21  | 0.19  | 0.20  | 0.19  | 0.21  | 0.26  |
| C18:3      | -0.15 | -0.16 | -0.15 | -0.14 | -0.16 | -0.06 |
| SFA        | 0.10  | 0.13  | 0.11  | 0.13  | 0.11  | -0.21 |
| MUFA       | 0.07  | 0.10  | 0.08  | 0.09  | 0.07  | -0.19 |
| Ca         | 0.34  | 0.36  | 0.34  | 0.34  | 0.35  | 0.15  |
| K          | 0.34  | 0.31  | 0.34  | 0.33  | 0.33  | 0.42  |
| Mg         | 0.08  | 0.05  | 0.08  | 0.06  | 0.08  | 0.45  |
| Na         | -0.60 | -0.61 | -0.60 | -0.61 | -0.60 | -0.28 |
| P          | -0.42 | -0.43 | -0.42 | -0.45 | -0.42 | 0.09  |
| B          | -0.22 | -0.25 | -0.24 | -0.25 | -0.22 | 0.10  |
| Mn         | -0.24 | -0.23 | -0.25 | -0.25 | -0.25 | -0.23 |
| Fe         | -0.60 | -0.62 | -0.62 | -0.61 | -0.60 | -0.34 |
| Cu         | -0.04 | -0.04 | -0.03 | -0.04 | -0.06 | 0.00  |
| Zn         | -0.42 | -0.42 | -0.41 | -0.42 | -0.41 | 0.03  |
| Mo         | 0.20  | 0.16  | 0.20  | 0.19  | 0.20  | 0.31  |
| Ni         | -0.08 | -0.09 | -0.06 | -0.08 | -0.08 | 0.08  |
| Cr         | 0.20  | 0.18  | 0.19  | 0.19  | 0.20  | 0.30  |
| Co         | 0.12  | 0.12  | 0.12  | 0.12  | 0.13  | 0.15  |
| Se         | 0.06  | 0.04  | 0.06  | 0.05  | 0.06  | 0.15  |
| V          | -0.03 | -0.06 | -0.05 | -0.05 | -0.02 | 0.25  |
| Asp        | 1.00  | 1.00  | 1.00  | 0.99  | 1.00  | 0.73  |
| Ser        | 1.00  | 1.00  | 1.00  | 0.99  | 0.99  | 0.68  |
| Glu        | 1.00  | 1.00  | 1.00  | 1.00  | 0.99  | 0.71  |
| Gly        | 0.99  | 0.99  | 1.00  | 1.00  | 0.99  | 0.69  |
| Ala        | 1.00  | 0.99  | 0.99  | 0.99  | 1.00  | 0.72  |
| Cys        | 0.73  | 0.68  | 0.71  | 0.69  | 0.72  | 1.00  |
| Tyr        | 0.99  | 0.98  | 0.99  | 0.99  | 0.99  | 0.71  |
| His        | 1.00  | 0.99  | 1.00  | 1.00  | 1.00  | 0.72  |
| Arg        | 1.00  | 0.99  | 0.99  | 0.99  | 1.00  | 0.73  |
| Pro        | 0.98  | 0.99  | 0.99  | 0.99  | 0.99  | 0.64  |
| Thr        | 1.00  | 0.98  | 0.99  | 0.99  | 0.99  | 0.77  |
| Val        | 0.98  | 0.97  | 0.98  | 0.98  | 0.98  | 0.65  |
| Met        | 0.98  | 0.97  | 0.98  | 0.98  | 0.98  | 0.75  |
| Ile        | 0.98  | 0.99  | 0.98  | 0.99  | 0.98  | 0.64  |
| Leu        | 0.99  | 0.99  | 0.99  | 0.99  | 0.99  | 0.71  |
| Phe        | 1.00  | 0.99  | 0.99  | 0.99  | 0.99  | 0.74  |
| Lys        | 0.99  | 0.98  | 0.98  | 0.99  | 0.99  | 0.73  |

(a). Correlation values

| r Value    | Asp   | Ser   | Glu   | Gly   | Ala   | Cys   |
|------------|-------|-------|-------|-------|-------|-------|
| Tocopherol | -0.74 | -0.75 | -0.75 | -0.76 | -0.74 | -0.39 |
| C16:0      | -0.31 | -0.30 | -0.29 | -0.30 | -0.29 | -0.18 |
| C18:0      | -0.11 | -0.11 | -0.12 | -0.11 | -0.11 | -0.01 |
| C18:1      | -0.14 | -0.14 | -0.14 | -0.15 | -0.15 | -0.12 |
| C18:2      | 0.21  | 0.19  | 0.20  | 0.19  | 0.21  | 0.26  |
| C18:3      | -0.15 | -0.16 | -0.15 | -0.14 | -0.16 | -0.06 |
| SFA        | 0.10  | 0.13  | 0.11  | 0.13  | 0.11  | -0.21 |
| MUFA       | 0.07  | 0.10  | 0.08  | 0.09  | 0.07  | -0.19 |
| Ca         | 0.34  | 0.36  | 0.34  | 0.34  | 0.35  | 0.15  |
| K          | 0.34  | 0.31  | 0.34  | 0.33  | 0.33  | 0.42  |
| Mg         | 0.08  | 0.05  | 0.08  | 0.06  | 0.08  | 0.45  |
| Na         | -0.60 | -0.61 | -0.60 | -0.61 | -0.60 | -0.28 |
| P          | -0.42 | -0.43 | -0.42 | -0.45 | -0.42 | 0.09  |
| B          | -0.22 | -0.25 | -0.24 | -0.25 | -0.22 | 0.10  |
| Mn         | -0.24 | -0.23 | -0.25 | -0.25 | -0.25 | -0.23 |
| Fe         | -0.60 | -0.62 | -0.62 | -0.61 | -0.60 | -0.34 |
| Cu         | -0.04 | -0.04 | -0.03 | -0.04 | -0.06 | 0.00  |
| Zn         | -0.42 | -0.42 | -0.41 | -0.42 | -0.41 | 0.03  |
| Mo         | 0.20  | 0.16  | 0.20  | 0.19  | 0.20  | 0.31  |
| Ni         | -0.08 | -0.09 | -0.06 | -0.08 | -0.08 | 0.08  |
| Cr         | 0.20  | 0.18  | 0.19  | 0.19  | 0.20  | 0.30  |
| Co         | 0.12  | 0.12  | 0.12  | 0.12  | 0.13  | 0.15  |
| Se         | 0.06  | 0.04  | 0.06  | 0.05  | 0.06  | 0.15  |
| V          | -0.03 | -0.06 | -0.05 | -0.05 | -0.02 | 0.25  |
| Asp        | 1.00  | 1.00  | 1.00  | 0.99  | 1.00  | 0.73  |
| Ser        | 1.00  | 1.00  | 1.00  | 0.99  | 0.99  | 0.68  |
| Glu        | 1.00  | 1.00  | 1.00  | 1.00  | 0.99  | 0.71  |
| Gly        | 0.99  | 0.99  | 1.00  | 1.00  | 0.99  | 0.69  |
| Ala        | 1.00  | 0.99  | 0.99  | 0.99  | 1.00  | 0.72  |
| Cys        | 0.73  | 0.68  | 0.71  | 0.69  | 0.72  | 1.00  |
| Tyr        | 0.99  | 0.98  | 0.99  | 0.99  | 0.99  | 0.71  |
| His        | 1.00  | 0.99  | 1.00  | 1.00  | 1.00  | 0.72  |
| Arg        | 1.00  | 0.99  | 0.99  | 0.99  | 1.00  | 0.73  |
| Pro        | 0.98  | 0.99  | 0.99  | 0.99  | 0.99  | 0.64  |
| Thr        | 1.00  | 0.98  | 0.99  | 0.99  | 0.99  | 0.77  |
| Val        | 0.98  | 0.97  | 0.98  | 0.98  | 0.98  | 0.65  |
| Met        | 0.98  | 0.97  | 0.98  | 0.98  | 0.98  | 0.75  |
| Ile        | 0.98  | 0.99  | 0.98  | 0.99  | 0.98  | 0.64  |
| Leu        | 0.99  | 0.99  | 0.99  | 0.99  | 0.99  | 0.71  |
| Phe        | 1.00  | 0.99  | 0.99  | 0.99  | 0.99  | 0.74  |
| Lys        | 0.99  | 0.98  | 0.98  | 0.99  | 0.99  | 0.73  |

(a). Correlation values

| r Value    | Tyr   | His   | Arg   | Pro   | Thr   | Val   |
|------------|-------|-------|-------|-------|-------|-------|
| Tocopherol | -0.75 | -0.74 | -0.72 | -0.79 | -0.72 | -0.71 |
| C16:0      | -0.26 | -0.30 | -0.31 | -0.30 | -0.31 | -0.31 |
| C18:0      | -0.12 | -0.11 | -0.11 | -0.11 | -0.12 | -0.11 |
| C18:1      | -0.14 | -0.15 | -0.14 | -0.13 | -0.14 | -0.14 |
| C18:2      | 0.19  | 0.21  | 0.21  | 0.17  | 0.22  | 0.21  |
| C18:3      | -0.14 | -0.16 | -0.16 | -0.17 | -0.15 | -0.17 |
| SFA        | 0.11  | 0.11  | 0.11  | 0.16  | 0.06  | 0.13  |
| MUFA       | 0.07  | 0.07  | 0.07  | 0.12  | 0.04  | 0.07  |
| Ca         | 0.30  | 0.35  | 0.35  | 0.36  | 0.32  | 0.36  |
| K          | 0.38  | 0.34  | 0.34  | 0.29  | 0.37  | 0.29  |
| Mg         | 0.08  | 0.08  | 0.09  | 0.02  | 0.12  | 0.02  |
| Na         | -0.57 | -0.60 | -0.60 | -0.61 | -0.58 | -0.64 |
| P          | -0.44 | -0.43 | -0.41 | -0.45 | -0.40 | -0.51 |
| B          | -0.24 | -0.21 | -0.19 | -0.29 | -0.19 | -0.22 |
| Mn         | -0.26 | -0.24 | -0.24 | -0.25 | -0.25 | -0.23 |
| Fe         | -0.64 | -0.60 | -0.59 | -0.64 | -0.60 | -0.54 |
| Cu         | 0.01  | -0.04 | -0.04 | -0.04 | -0.03 | -0.08 |
| Zn         | -0.44 | -0.42 | -0.42 | -0.42 | -0.40 | -0.48 |
| Mo         | 0.26  | 0.21  | 0.21  | 0.15  | 0.24  | 0.21  |
| Ni         | -0.05 | -0.06 | -0.07 | -0.10 | -0.05 | -0.10 |
| Cr         | 0.20  | 0.20  | 0.20  | 0.12  | 0.23  | 0.20  |
| Co         | 0.09  | 0.13  | 0.12  | 0.13  | 0.11  | 0.11  |
| Se         | 0.09  | 0.06  | 0.06  | 0.03  | 0.08  | 0.06  |
| V          | -0.08 | -0.02 | -0.01 | -0.09 | -0.01 | -0.01 |
| Asp        | 0.99  | 1.00  | 1.00  | 0.98  | 1.00  | 0.98  |
| Ser        | 0.98  | 0.99  | 0.99  | 0.99  | 0.98  | 0.97  |
| Glu        | 0.99  | 1.00  | 0.99  | 0.99  | 0.99  | 0.98  |
| Gly        | 0.99  | 1.00  | 0.99  | 0.99  | 0.99  | 0.98  |
| Ala        | 0.99  | 1.00  | 1.00  | 0.99  | 0.99  | 0.98  |
| Cys        | 0.71  | 0.72  | 0.73  | 0.64  | 0.77  | 0.65  |
| Tyr        | 1.00  | 0.99  | 0.99  | 0.98  | 0.99  | 0.97  |
| His        | 0.99  | 1.00  | 1.00  | 0.98  | 0.99  | 0.99  |
| Arg        | 0.99  | 1.00  | 1.00  | 0.98  | 0.99  | 0.98  |
| Pro        | 0.98  | 0.98  | 0.98  | 1.00  | 0.97  | 0.97  |
| Thr        | 0.99  | 0.99  | 0.99  | 0.97  | 1.00  | 0.98  |
| Val        | 0.97  | 0.99  | 0.98  | 0.97  | 0.98  | 1.00  |
| Met        | 0.96  | 0.98  | 0.98  | 0.96  | 0.98  | 0.97  |
| Ile        | 0.96  | 0.98  | 0.98  | 0.99  | 0.97  | 0.97  |
| Leu        | 0.97  | 0.99  | 0.99  | 0.98  | 0.98  | 0.98  |
| Phe        | 0.99  | 1.00  | 1.00  | 0.97  | 1.00  | 0.98  |
| Lys        | 0.98  | 0.99  | 0.99  | 0.97  | 0.99  | 0.98  |

(a). Correlation values

| r Value    | Met   | Ile   | Leu   | Phe   | Lys   |
|------------|-------|-------|-------|-------|-------|
| Tocopherol | -0.70 | -0.77 | -0.73 | -0.73 | -0.74 |
| C16:0      | -0.32 | -0.33 | -0.33 | -0.30 | -0.29 |
| C18:0      | -0.09 | -0.09 | -0.09 | -0.11 | -0.11 |
| C18:1      | -0.16 | -0.15 | -0.15 | -0.13 | -0.13 |
| C18:2      | 0.23  | 0.19  | 0.21  | 0.21  | 0.19  |
| C18:3      | -0.15 | -0.15 | -0.15 | -0.16 | -0.14 |
| SFA        | 0.10  | 0.17  | 0.11  | 0.09  | 0.08  |
| MUFA       | 0.06  | 0.13  | 0.08  | 0.06  | 0.05  |
| Ca         | 0.38  | 0.40  | 0.39  | 0.33  | 0.32  |
| K          | 0.30  | 0.25  | 0.28  | 0.37  | 0.40  |
| Mg         | 0.11  | 0.02  | 0.07  | 0.10  | 0.09  |
| Na         | -0.60 | -0.64 | -0.62 | -0.60 | -0.60 |
| P          | -0.38 | -0.46 | -0.41 | -0.42 | -0.45 |
| B          | -0.17 | -0.28 | -0.22 | -0.20 | -0.21 |
| Mn         | -0.24 | -0.25 | -0.23 | -0.25 | -0.25 |
| Fe         | -0.53 | -0.60 | -0.56 | -0.61 | -0.62 |
| Cu         | -0.11 | -0.10 | -0.11 | -0.02 | -0.01 |
| Zn         | -0.39 | -0.43 | -0.39 | -0.42 | -0.43 |
| Mo         | 0.18  | 0.12  | 0.14  | 0.24  | 0.27  |
| Ni         | -0.09 | -0.14 | -0.11 | -0.06 | -0.04 |
| Cr         | 0.23  | 0.17  | 0.19  | 0.22  | 0.22  |
| Co         | 0.13  | 0.12  | 0.14  | 0.11  | 0.12  |
| Se         | 0.04  | 0.01  | 0.03  | 0.08  | 0.09  |
| V          | 0.05  | -0.04 | 0.01  | -0.03 | -0.02 |
| Asp        | 0.98  | 0.98  | 0.99  | 1.00  | 0.99  |
| Ser        | 0.97  | 0.99  | 0.99  | 0.99  | 0.98  |
| Glu        | 0.98  | 0.98  | 0.99  | 0.99  | 0.98  |
| Gly        | 0.98  | 0.99  | 0.99  | 0.99  | 0.99  |
| Ala        | 0.98  | 0.98  | 0.99  | 0.99  | 0.99  |
| Cys        | 0.75  | 0.64  | 0.71  | 0.74  | 0.73  |
| Tyr        | 0.96  | 0.96  | 0.97  | 0.99  | 0.98  |
| His        | 0.98  | 0.98  | 0.99  | 1.00  | 0.99  |
| Arg        | 0.98  | 0.98  | 0.99  | 1.00  | 0.99  |
| Pro        | 0.96  | 0.99  | 0.98  | 0.97  | 0.97  |
| Thr        | 0.98  | 0.97  | 0.98  | 1.00  | 0.99  |
| Val        | 0.97  | 0.97  | 0.98  | 0.98  | 0.98  |
| Met        | 1.00  | 0.97  | 0.99  | 0.98  | 0.97  |
| Ile        | 0.97  | 1.00  | 0.99  | 0.97  | 0.97  |
| Leu        | 0.99  | 0.99  | 1.00  | 0.98  | 0.97  |
| Phe        | 0.98  | 0.97  | 0.98  | 1.00  | 0.99  |
| Lys        | 0.97  | 0.97  | 0.97  | 0.99  | 1.00  |

**(b). Significant values**

| P Value    | Tocopherol | C16:0 | C16:1 | C18:0 | C18:1 | C18:2 | C18:3 | SFA   |
|------------|------------|-------|-------|-------|-------|-------|-------|-------|
| Tocopherol | 1.00       | <0.01 | <0.01 | 0.59  | 0.27  | 0.39  | 0.38  | <0.01 |
| C16:0      | <0.01      | 1.00  | <0.01 | 0.09  | 0.04  | 0.02  | 0.02  | 0.38  |
| C16:1      | <0.01      | <0.01 | 1.00  | <0.01 | 0.59  | 0.40  | 0.66  | 0.36  |
| C18:0      | 0.59       | 0.09  | <0.01 | 1.00  | <0.01 | 0.01  | 0.23  | 0.31  |
| C18:1      | 0.27       | 0.04  | 0.59  | <0.01 | 1.00  | <0.01 | <0.01 | 0.87  |
| C18:2      | 0.39       | 0.02  | 0.40  | 0.01  | <0.01 | 1.00  | 0.07  | 0.90  |
| C18:3      | 0.38       | 0.02  | 0.66  | 0.23  | <0.01 | 0.07  | 1.00  | 0.78  |
| SFA        | <0.01      | 0.38  | 0.36  | 0.31  | 0.87  | 0.90  | 0.78  | 1.00  |
| MUFA       | <0.01      | 0.56  | 0.14  | 0.06  | <0.01 | 0.02  | 0.60  | <0.01 |
| Ca         | <0.01      | <0.01 | 0.04  | <0.01 | 0.01  | <0.01 | 0.01  | 1.00  |
| K          | 0.01       | 0.22  | <0.01 | <0.01 | 0.16  | 0.06  | 0.05  | 0.85  |
| Mg         | 0.07       | 0.05  | <0.01 | 0.03  | 0.16  | 0.02  | 0.01  | <0.01 |
| Na         | <0.01      | <0.01 | 0.04  | 0.10  | 0.69  | 0.34  | <0.01 | <0.01 |
| P          | <0.01      | <0.01 | <0.01 | 0.28  | 0.82  | 0.73  | 0.38  | <0.01 |
| B          | <0.01      | 0.05  | 0.47  | 0.02  | 0.01  | 0.46  | 0.02  | <0.01 |
| Mn         | <0.01      | 0.05  | <0.01 | 0.26  | 0.06  | 0.67  | 0.01  | 0.11  |
| Fe         | <0.01      | 0.02  | 0.23  | <0.01 | 0.49  | 0.79  | 0.61  | 0.02  |
| Cu         | 0.71       | 0.09  | 0.01  | 0.04  | <0.01 | 0.09  | 0.06  | 0.33  |
| Zn         | <0.01      | <0.01 | 0.18  | <0.01 | 0.47  | 0.49  | 0.59  | <0.01 |
| Mo         | <0.01      | <0.01 | 0.87  | <0.01 | 0.87  | 0.74  | <0.01 | 0.60  |
| Ni         | <0.01      | <0.01 | <0.01 | 1.00  | 0.27  | 0.58  | 0.51  | 0.29  |
| Cr         | 0.37       | 0.01  | 0.57  | 0.59  | 0.83  | 0.12  | 0.28  | 0.91  |
| Co         | 0.79       | 0.43  | 0.26  | <0.01 | 0.09  | 0.12  | <0.01 | 0.05  |
| Se         | 0.31       | 0.04  | 0.61  | 0.47  | 0.77  | 0.49  | 0.81  | 0.15  |
| V          | <0.01      | 0.12  | 0.88  | 0.04  | 0.09  | 0.04  | 0.63  | <0.01 |
| Asp        | <0.01      | <0.01 | <0.01 | 0.06  | 0.02  | <0.01 | 0.01  | 0.09  |
| Ser        | <0.01      | <0.01 | <0.01 | 0.06  | 0.02  | <0.01 | 0.01  | 0.03  |
| Glu        | <0.01      | <0.01 | <0.01 | 0.05  | 0.02  | <0.01 | 0.02  | 0.06  |
| Gly        | <0.01      | <0.01 | <0.01 | 0.08  | 0.02  | <0.01 | 0.02  | 0.03  |
| Ala        | <0.01      | <0.01 | <0.01 | 0.08  | 0.02  | <0.01 | 0.01  | 0.08  |
| Cys        | <0.01      | <0.01 | 0.13  | 0.88  | 0.06  | <0.01 | 0.29  | <0.01 |
| Tyr        | <0.01      | <0.01 | <0.01 | 0.05  | 0.02  | <0.01 | 0.02  | 0.08  |
| His        | <0.01      | <0.01 | <0.01 | 0.07  | 0.02  | <0.01 | 0.01  | 0.07  |
| Arg        | <0.01      | <0.01 | 0.02  | 0.06  | 0.02  | <0.01 | 0.01  | 0.08  |
| Pro        | <0.01      | <0.01 | 0.01  | 0.06  | 0.03  | <0.01 | 0.01  | 0.01  |
| Thr        | <0.01      | <0.01 | 0.01  | 0.06  | 0.02  | <0.01 | 0.01  | 0.29  |
| Val        | <0.01      | <0.01 | 0.57  | 0.08  | 0.02  | <0.01 | 0.01  | 0.03  |
| Met        | <0.01      | <0.01 | 0.23  | 0.16  | 0.01  | <0.01 | 0.01  | 0.10  |
| Ile        | <0.01      | <0.01 | 0.10  | 0.13  | 0.01  | <0.01 | 0.01  | <0.01 |
| Leu        | <0.01      | <0.01 | 0.05  | 0.14  | 0.01  | <0.01 | 0.01  | 0.06  |
| Phe        | <0.01      | <0.01 | 0.03  | 0.07  | 0.03  | <0.01 | 0.01  | 0.13  |
| Lys        | <0.01      | <0.01 | <0.01 | 0.06  | 0.04  | <0.01 | 0.02  | 0.18  |

**(b). Significant values**

| P Value    | MUFA  | Ca    | K     | Mg    | Na    | P     | B     | Mn    |
|------------|-------|-------|-------|-------|-------|-------|-------|-------|
| Tocopherol | <0.01 | <0.01 | 0.01  | 0.07  | <0.01 | <0.01 | <0.01 | <0.01 |
| C16:0      | 0.56  | <0.01 | 0.22  | 0.05  | <0.01 | <0.01 | 0.05  | 0.05  |
| C16:1      | 0.14  | 0.04  | <0.01 | <0.01 | 0.04  | <0.01 | 0.47  | <0.01 |
| C18:0      | 0.06  | <0.01 | <0.01 | 0.03  | 0.10  | 0.28  | 0.02  | 0.26  |
| C18:1      | <0.01 | 0.01  | 0.16  | 0.16  | 0.69  | 0.82  | 0.01  | 0.06  |
| C18:2      | 0.02  | <0.01 | 0.06  | 0.02  | 0.34  | 0.73  | 0.46  | 0.67  |
| C18:3      | 0.60  | 0.01  | 0.05  | 0.01  | <0.01 | 0.38  | 0.02  | 0.01  |
| SFA        | <0.01 | 1.00  | 0.85  | <0.01 | <0.01 | <0.01 | <0.01 | 0.11  |
| MUFA       | 1.00  | 0.68  | 0.80  | 0.01  | 0.01  | 0.01  | <0.01 | 0.14  |
| Ca         | 0.68  | 1.00  | 0.03  | <0.01 | <0.01 | 0.23  | 0.01  | 0.11  |
| K          | 0.80  | 0.03  | 1.00  | <0.01 | 0.80  | 0.51  | 0.02  | 0.30  |
| Mg         | 0.01  | <0.01 | <0.01 | 1.00  | <0.01 | <0.01 | <0.01 | 0.18  |
| Na         | 0.01  | <0.01 | 0.80  | <0.01 | 1.00  | <0.01 | <0.01 | 0.32  |
| P          | 0.01  | 0.23  | 0.51  | <0.01 | <0.01 | 1.00  | <0.01 | <0.01 |
| B          | <0.01 | 0.01  | 0.02  | <0.01 | <0.01 | <0.01 | 1.00  | <0.01 |
| Mn         | 0.14  | 0.11  | 0.30  | 0.18  | 0.32  | <0.01 | <0.01 | 1.00  |
| Fe         | <0.01 | 0.39  | <0.01 | 0.54  | <0.01 | <0.01 | <0.01 | <0.01 |
| Cu         | 0.03  | <0.01 | <0.01 | 0.11  | 0.17  | 0.46  | 0.63  | 0.46  |
| Zn         | <0.01 | 0.47  | 0.01  | <0.01 | <0.01 | <0.01 | <0.01 | 0.01  |
| Mo         | 0.53  | <0.01 | <0.01 | <0.01 | <0.01 | 0.07  | 0.89  | <0.01 |
| Ni         | 0.82  | <0.01 | <0.01 | <0.01 | <0.01 | <0.01 | <0.01 | <0.01 |
| Cr         | 0.74  | 0.91  | 0.24  | 0.40  | <0.01 | 0.21  | 0.69  | <0.01 |
| Co         | 0.01  | <0.01 | 0.86  | 0.21  | 0.05  | 0.12  | 0.07  | <0.01 |
| Se         | 0.07  | 0.77  | 0.01  | 0.01  | 0.05  | 0.55  | 0.76  | <0.01 |
| V          | <0.01 | 0.02  | 0.25  | <0.01 | 0.99  | <0.01 | <0.01 | 0.15  |
| Asp        | 0.26  | <0.01 | <0.01 | 0.17  | <0.01 | <0.01 | <0.01 | <0.01 |
| Ser        | 0.10  | <0.01 | <0.01 | 0.39  | <0.01 | <0.01 | <0.01 | <0.01 |
| Glu        | 0.17  | <0.01 | <0.01 | 0.20  | <0.01 | <0.01 | <0.01 | <0.01 |
| Gly        | 0.12  | <0.01 | <0.01 | 0.31  | <0.01 | <0.01 | <0.01 | <0.01 |
| Ala        | 0.28  | <0.01 | <0.01 | 0.17  | <0.01 | <0.01 | <0.01 | <0.01 |
| Cys        | <0.01 | 0.01  | <0.01 | <0.01 | <0.01 | 0.13  | 0.11  | <0.01 |
| Tyr        | 0.26  | <0.01 | <0.01 | 0.20  | <0.01 | <0.01 | <0.01 | <0.01 |
| His        | 0.23  | <0.01 | <0.01 | 0.21  | <0.01 | <0.01 | <0.01 | <0.01 |
| Arg        | 0.26  | <0.01 | <0.01 | 0.13  | <0.01 | <0.01 | <0.01 | <0.01 |
| Pro        | 0.04  | <0.01 | <0.01 | 0.69  | <0.01 | <0.01 | <0.01 | <0.01 |
| Thr        | 0.56  | <0.01 | <0.01 | 0.05  | <0.01 | <0.01 | <0.01 | <0.01 |
| Val        | 0.22  | <0.01 | <0.01 | 0.78  | <0.01 | <0.01 | <0.01 | <0.01 |
| Met        | 0.36  | <0.01 | <0.01 | 0.07  | <0.01 | <0.01 | <0.01 | <0.01 |
| Ile        | 0.03  | <0.01 | <0.01 | 0.78  | <0.01 | <0.01 | <0.01 | <0.01 |
| Leu        | 0.20  | <0.01 | <0.01 | 0.22  | <0.01 | <0.01 | <0.01 | <0.01 |
| Phe        | 0.34  | <0.01 | <0.01 | 0.12  | <0.01 | <0.01 | <0.01 | <0.01 |
| Lys        | 0.40  | <0.01 | <0.01 | 0.12  | <0.01 | <0.01 | <0.01 | <0.01 |

**(b). Significant values**

| P Value    | Fe    | Cu    | Zn    | Mo    | Ni    | Cr    | Co    | Se    |
|------------|-------|-------|-------|-------|-------|-------|-------|-------|
| Tocopherol | <0.01 | 0.71  | <0.01 | <0.01 | <0.01 | 0.37  | 0.79  | 0.31  |
| C16:0      | 0.02  | 0.09  | <0.01 | <0.01 | <0.01 | 0.01  | 0.43  | 0.04  |
| C16:1      | 0.23  | 0.01  | 0.18  | 0.87  | <0.01 | 0.57  | 0.26  | 0.61  |
| C18:0      | <0.01 | 0.04  | <0.01 | <0.01 | 1.00  | 0.59  | <0.01 | 0.47  |
| C18:1      | 0.49  | <0.01 | 0.47  | 0.87  | 0.27  | 0.83  | 0.09  | 0.77  |
| C18:2      | 0.79  | 0.09  | 0.49  | 0.74  | 0.58  | 0.12  | 0.12  | 0.49  |
| C18:3      | 0.61  | 0.06  | 0.59  | <0.01 | 0.51  | 0.28  | <0.01 | 0.81  |
| SFA        | 0.02  | 0.33  | <0.01 | 0.60  | 0.29  | 0.91  | 0.05  | 0.15  |
| MUFA       | <0.01 | 0.03  | <0.01 | 0.53  | 0.82  | 0.74  | 0.01  | 0.07  |
| Ca         | 0.39  | <0.01 | 0.47  | <0.01 | <0.01 | 0.91  | <0.01 | 0.77  |
| K          | <0.01 | <0.01 | 0.01  | <0.01 | <0.01 | 0.24  | 0.86  | 0.01  |
| Mg         | 0.54  | 0.11  | <0.01 | <0.01 | <0.01 | 0.40  | 0.21  | 0.01  |
| Na         | <0.01 | 0.17  | <0.01 | <0.01 | <0.01 | <0.01 | 0.05  | 0.05  |
| P          | <0.01 | 0.46  | <0.01 | 0.07  | <0.01 | 0.21  | 0.12  | 0.55  |
| B          | <0.01 | 0.63  | <0.01 | 0.89  | <0.01 | 0.69  | 0.07  | 0.76  |
| Mn         | <0.01 | 0.46  | 0.01  | <0.01 | <0.01 | <0.01 | <0.01 | <0.01 |
| Fe         | 1.00  | <0.01 | <0.01 | <0.01 | 0.88  | 0.85  | 0.01  | 0.32  |
| Cu         | <0.01 | 1.00  | <0.01 | <0.01 | <0.01 | 0.69  | 0.17  | 0.02  |
| Zn         | <0.01 | <0.01 | 1.00  | 0.16  | <0.01 | 0.05  | <0.01 | 0.02  |
| Mo         | <0.01 | <0.01 | 0.16  | 1.00  | <0.01 | 0.26  | 0.04  | <0.01 |
| Ni         | 0.88  | <0.01 | <0.01 | <0.01 | 1.00  | 0.59  | <0.01 | 0.16  |
| Cr         | 0.85  | 0.69  | 0.05  | 0.26  | 0.59  | 1.00  | 0.18  | 0.66  |
| Co         | 0.01  | 0.17  | <0.01 | 0.04  | <0.01 | 0.18  | 1.00  | 0.65  |
| Se         | 0.32  | 0.02  | 0.02  | <0.01 | 0.16  | 0.66  | 0.65  | 1.00  |
| V          | <0.01 | <0.01 | <0.01 | 0.13  | 0.04  | <0.01 | <0.01 | 0.72  |
| Asp        | <0.01 | 0.49  | <0.01 | <0.01 | 0.21  | <0.01 | 0.05  | 0.38  |
| Ser        | <0.01 | 0.48  | <0.01 | 0.01  | 0.14  | <0.01 | 0.05  | 0.57  |
| Glu        | <0.01 | 0.65  | <0.01 | <0.01 | 0.28  | <0.01 | 0.05  | 0.34  |
| Gly        | <0.01 | 0.54  | <0.01 | <0.01 | 0.20  | <0.01 | 0.04  | 0.40  |
| Ala        | <0.01 | 0.35  | <0.01 | <0.01 | 0.20  | <0.01 | 0.04  | 0.33  |
| Cys        | <0.01 | 0.97  | 0.59  | <0.01 | 0.21  | <0.01 | 0.01  | 0.02  |
| Tyr        | <0.01 | 0.87  | <0.01 | <0.01 | 0.44  | <0.01 | 0.13  | 0.18  |
| His        | <0.01 | 0.47  | <0.01 | <0.01 | 0.28  | <0.01 | 0.04  | 0.36  |
| Arg        | <0.01 | 0.47  | <0.01 | <0.01 | 0.22  | <0.01 | 0.04  | 0.35  |
| Pro        | <0.01 | 0.49  | <0.01 | 0.02  | 0.09  | 0.05  | 0.04  | 0.60  |
| Thr        | <0.01 | 0.59  | <0.01 | <0.01 | 0.37  | <0.01 | 0.06  | 0.21  |
| Val        | <0.01 | 0.17  | <0.01 | <0.01 | 0.10  | <0.01 | 0.06  | 0.32  |
| Met        | <0.01 | 0.08  | <0.01 | <0.01 | 0.15  | <0.01 | 0.03  | 0.51  |
| Ile        | <0.01 | 0.12  | <0.01 | 0.06  | 0.02  | <0.01 | 0.05  | 0.84  |
| Leu        | <0.01 | 0.08  | <0.01 | 0.03  | 0.08  | <0.01 | 0.02  | 0.67  |
| Phe        | <0.01 | 0.78  | <0.01 | <0.01 | 0.34  | <0.01 | 0.07  | 0.21  |
| Lys        | <0.01 | 0.86  | <0.01 | <0.01 | 0.52  | <0.01 | 0.04  | 0.15  |

### (b). Significant values

[illegible]



### (b). Significant values

| P Value    | His   | Arg   | Pro   | Thr   | Val   | Met   | Ile   | Leu   | Phe   | Lys   |
|------------|-------|-------|-------|-------|-------|-------|-------|-------|-------|-------|
| Tocopherol | <0.01 | <0.01 | <0.01 | <0.01 | <0.01 | <0.01 | <0.01 | <0.01 | <0.01 | <0.01 |
| C16:0      | <0.01 | <0.01 | <0.01 | <0.01 | <0.01 | <0.01 | <0.01 | <0.01 | <0.01 | <0.01 |
| C16:1      | <0.01 | 0.02  | 0.01  | 0.01  | 0.57  | 0.23  | 0.10  | 0.05  | 0.03  | <0.01 |
| C18:0      | 0.07  | 0.06  | 0.06  | 0.06  | 0.08  | 0.16  | 0.13  | 0.14  | 0.07  | 0.06  |
| C18:1      | 0.02  | 0.02  | 0.03  | 0.02  | 0.02  | 0.01  | 0.01  | 0.01  | 0.03  | 0.04  |
| C18:2      | <0.01 | <0.01 | <0.01 | <0.01 | <0.01 | <0.01 | <0.01 | <0.01 | <0.01 | <0.01 |
| C18:3      | 0.01  | 0.01  | 0.01  | 0.01  | 0.01  | 0.01  | 0.01  | 0.01  | 0.01  | 0.02  |
| SFA        | 0.07  | 0.08  | 0.01  | 0.29  | 0.03  | 0.10  | <0.01 | 0.06  | 0.13  | 0.18  |
| MUFA       | 0.23  | 0.26  | 0.04  | 0.56  | 0.22  | 0.36  | 0.03  | 0.20  | 0.34  | 0.40  |
| Ca         | <0.01 | <0.01 | <0.01 | <0.01 | <0.01 | <0.01 | <0.01 | <0.01 | <0.01 | <0.01 |
| K          | <0.01 | <0.01 | <0.01 | <0.01 | <0.01 | <0.01 | <0.01 | <0.01 | <0.01 | <0.01 |
| Mg         | 0.21  | 0.13  | 0.69  | 0.05  | 0.78  | 0.07  | 0.78  | 0.22  | 0.12  | 0.12  |
| Na         | <0.01 | <0.01 | <0.01 | <0.01 | <0.01 | <0.01 | <0.01 | <0.01 | <0.01 | <0.01 |
| P          | <0.01 | <0.01 | <0.01 | <0.01 | <0.01 | <0.01 | <0.01 | <0.01 | <0.01 | <0.01 |
| B          | <0.01 | <0.01 | <0.01 | <0.01 | <0.01 | <0.01 | <0.01 | <0.01 | <0.01 | <0.01 |
| Mn         | <0.01 | <0.01 | <0.01 | <0.01 | <0.01 | <0.01 | <0.01 | <0.01 | <0.01 | <0.01 |
| Fe         | <0.01 | <0.01 | <0.01 | <0.01 | <0.01 | <0.01 | <0.01 | <0.01 | <0.01 | <0.01 |
| Cu         | 0.47  | 0.47  | 0.49  | 0.59  | 0.17  | 0.08  | 0.12  | 0.08  | 0.78  | 0.86  |
| Zn         | <0.01 | <0.01 | <0.01 | <0.01 | <0.01 | <0.01 | <0.01 | <0.01 | <0.01 | <0.01 |
| Mo         | <0.01 | <0.01 | 0.02  | <0.01 | <0.01 | <0.01 | 0.06  | 0.03  | <0.01 | <0.01 |
| Ni         | 0.28  | 0.22  | 0.09  | 0.37  | 0.10  | 0.15  | 0.02  | 0.08  | 0.34  | 0.52  |
| Cr         | <0.01 | <0.01 | 0.05  | <0.01 | <0.01 | <0.01 | <0.01 | <0.01 | <0.01 | <0.01 |
| Co         | 0.04  | 0.04  | 0.04  | 0.06  | 0.06  | 0.03  | 0.05  | 0.02  | 0.07  | 0.04  |
| Se         | 0.36  | 0.35  | 0.60  | 0.21  | 0.32  | 0.51  | 0.84  | 0.67  | 0.21  | 0.15  |
| V          | 0.70  | 0.85  | 0.16  | 0.93  | 0.82  | 0.42  | 0.58  | 0.85  | 0.66  | 0.75  |
| Asp        | <0.01 | <0.01 | <0.01 | <0.01 | <0.01 | <0.01 | <0.01 | <0.01 | <0.01 | <0.01 |
| Ser        | <0.01 | <0.01 | <0.01 | <0.01 | <0.01 | <0.01 | <0.01 | <0.01 | <0.01 | <0.01 |
| Glu        | <0.01 | <0.01 | <0.01 | <0.01 | <0.01 | <0.01 | <0.01 | <0.01 | <0.01 | <0.01 |
| Gly        | <0.01 | <0.01 | <0.01 | <0.01 | <0.01 | <0.01 | <0.01 | <0.01 | <0.01 | <0.01 |
| Ala        | <0.01 | <0.01 | <0.01 | <0.01 | <0.01 | <0.01 | <0.01 | <0.01 | <0.01 | <0.01 |
| Cys        | <0.01 | <0.01 | <0.01 | <0.01 | <0.01 | <0.01 | <0.01 | <0.01 | <0.01 | <0.01 |
| Tyr        | <0.01 | <0.01 | <0.01 | <0.01 | <0.01 | <0.01 | <0.01 | <0.01 | <0.01 | <0.01 |
| His        | 1.00  | <0.01 | <0.01 | <0.01 | <0.01 | <0.01 | <0.01 | <0.01 | <0.01 | <0.01 |
| Arg        | <0.01 | 1.00  | <0.01 | <0.01 | <0.01 | <0.01 | <0.01 | <0.01 | <0.01 | <0.01 |
| Pro        | <0.01 | <0.01 | 1.00  | <0.01 | <0.01 | <0.01 | <0.01 | <0.01 | <0.01 | <0.01 |
| Thr        | <0.01 | <0.01 | <0.01 | 1.00  | <0.01 | <0.01 | <0.01 | <0.01 | <0.01 | <0.01 |
| Val        | <0.01 | <0.01 | <0.01 | <0.01 | 1.00  | <0.01 | <0.01 | <0.01 | <0.01 | <0.01 |
| Met        | <0.01 | <0.01 | <0.01 | <0.01 | <0.01 | 1.00  | <0.01 | <0.01 | <0.01 | <0.01 |
| Ile        | <0.01 | <0.01 | <0.01 | <0.01 | <0.01 | <0.01 | 1.00  | <0.01 | <0.01 | <0.01 |
| Leu        | <0.01 | <0.01 | <0.01 | <0.01 | <0.01 | <0.01 | <0.01 | 1.00  | <0.01 | <0.01 |
| Phe        | <0.01 | <0.01 | <0.01 | <0.01 | <0.01 | <0.01 | <0.01 | <0.01 | 1.00  | <0.01 |
| Lys        | <0.01 | <0.01 | <0.01 | <0.01 | <0.01 | <0.01 | <0.01 | <0.01 | <0.01 | 1.00  |

**Table S4. Soil properties (pH and OM) and content of 12 mineral elements in the soil**

|    | Mean           | Min            | Max            | SD            | CV (%) |
|----|----------------|----------------|----------------|---------------|--------|
| Fe | 25843.56 mg/kg | 19717.70 mg/kg | 41802.39 mg/kg | 6474.22 mg/kg | 25.05  |
| K  | 21968.95 mg/kg | 18715.00 mg/kg | 26423.33 mg/kg | 1639.09 mg/kg | 7.46   |
| Mg | 13995.88 mg/kg | 5663.33 mg/kg  | 22146.67 mg/kg | 3590.14 mg/kg | 25.65  |
| Mn | 565.48 mg/kg   | 422.53 mg/kg   | 1087.17 mg/kg  | 129.86 mg/kg  | 22.97  |
| Na | 15935.09 mg/kg | 8660.00 mg/kg  | 18071.67 mg/kg | 1947.28 mg/kg | 12.22  |
| Ni | 26.24 mg/kg    | 19.08 mg/kg    | 43.73 mg/kg    | 7.70 mg/kg    | 29.34  |
| P  | 839.38 mg/kg   | 349.72 mg/kg   | 1024.17 mg/kg  | 153.57 mg/kg  | 18.3   |
| Cu | 19.84 mg/kg    | 12.57 mg/kg    | 36.53 mg/kg    | 7.48 mg/kg    | 37.73  |
| Zn | 67.04 mg/kg    | 53.50 mg/kg    | 91.07 mg/kg    | 10.02 mg/kg   | 14.94  |
| Mo | 0.69 mg/kg     | 0.54 mg/kg     | 0.82 mg/kg     | 0.08 mg/kg    | 11.7   |
| Co | 12.83 mg/kg    | 10.12 mg/kg    | 21.11 mg/kg    | 3.26 mg/kg    | 25.38  |
| Ba | 479.39 mg/kg   | 402.42 mg/kg   | 621.83 mg/kg   | 43.26 mg/kg   | 9.02   |
| Cr | 59.92 mg/kg    | 41.72 mg/kg    | 116.07 mg/kg   | 21.89 mg/kg   | 36.53  |
| Pb | 12.76 mg/kg    | 10.07 mg/kg    | 18.95 mg/kg    | 2.42 mg/kg    | 18.99  |
| Cd | 0.33 mg/kg     | 0.29 mg/kg     | 0.45 mg/kg     | 0.04 mg/kg    | 11.09  |
| pH | 7.79           | 6.57           | 8.43           | 0.49          | 6.31   |
| OM | 16.58 g/kg     | 7.79 g/kg      | 26.69 g/kg     | 5.58 g/kg     | 33.68  |

**Table S5 Correlations between soil properties**  
**Correlation values**  
**(a)**

| r Value | Zn    | Mo    | Co    | Ba    | Cr    | Pb    | Cd    | pH    | OM    |
|---------|-------|-------|-------|-------|-------|-------|-------|-------|-------|
| Fe      | 0.78  | -0.19 | 0.96  | -0.17 | 0.94  | -0.11 | 0.58  | -0.38 | 0.82  |
| K       | 0.21  | -0.04 | -0.25 | 0.91  | -0.28 | 0.76  | 0.38  | -0.31 | 0.20  |
| Mg      | 0.38  | 0.17  | 0.63  | -0.81 | 0.57  | -0.55 | 0.05  | 0.38  | 0.12  |
| Mn      | 0.69  | 0.17  | 0.47  | 0.59  | 0.38  | 0.43  | 0.77  | -0.40 | 0.53  |
| Na      | -0.36 | -0.17 | -0.04 | -0.84 | 0.08  | -0.64 | -0.56 | 0.50  | -0.28 |
| Ni      | 0.82  | -0.19 | 0.98  | -0.10 | 0.97  | -0.12 | 0.60  | -0.43 | 0.84  |
| P       | 0.37  | 0.28  | 0.08  | 0.04  | -0.03 | 0.17  | 0.33  | 0.48  | -0.03 |
| Cu      | 0.57  | -0.14 | 0.75  | -0.10 | 0.74  | -0.01 | 0.50  | -0.65 | 0.63  |
| Zn      | 1.00  | 0.00  | 0.83  | 0.16  | 0.74  | 0.23  | 0.83  | -0.32 | 0.74  |
| Mo      | 0.00  | 1.00  | -0.11 | -0.02 | -0.24 | 0.27  | 0.24  | 0.02  | -0.47 |
| Co      | 0.83  | -0.11 | 1.00  | -0.24 | 0.97  | -0.17 | 0.59  | -0.31 | 0.77  |
| Ba      | 0.16  | -0.02 | -0.24 | 1.00  | -0.27 | 0.74  | 0.42  | -0.48 | 0.22  |
| Cr      | 0.74  | -0.24 | 0.97  | -0.27 | 1.00  | -0.27 | 0.48  | -0.34 | 0.79  |
| Pb      | 0.23  | 0.27  | -0.17 | 0.74  | -0.27 | 1.00  | 0.58  | -0.38 | 0.08  |
| Cd      | 0.83  | 0.24  | 0.59  | 0.42  | 0.48  | 0.58  | 1.00  | -0.52 | 0.55  |
| pH      | -0.32 | 0.02  | -0.31 | -0.48 | -0.34 | -0.38 | -0.52 | 1.00  | -0.40 |
| OM      | 0.74  | -0.47 | 0.77  | 0.22  | 0.79  | 0.08  | 0.55  | -0.40 | 1.00  |

**(b)Significance values**

| P Value | Zn    | Mo   | Co    | Ba    | Cr    | Pb    | Cd    | pH    | OM    |
|---------|-------|------|-------|-------|-------|-------|-------|-------|-------|
| Fe      | <0.01 | 0.45 | <0.01 | 0.49  | <0.01 | 0.65  | 0.01  | 0.11  | <0.01 |
| K       | 0.40  | 0.89 | 0.29  | <0.01 | 0.24  | <0.01 | 0.10  | 0.20  | 0.42  |
| Mg      | 0.11  | 0.50 | <0.01 | <0.01 | 0.01  | 0.02  | 0.83  | 0.10  | 0.63  |
| Mn      | <0.01 | 0.50 | 0.04  | 0.01  | 0.11  | 0.06  | <0.01 | 0.09  | 0.02  |
| Na      | 0.13  | 0.49 | 0.88  | <0.01 | 0.76  | <0.01 | 0.01  | 0.03  | 0.24  |
| Ni      | <0.01 | 0.45 | <0.01 | 0.68  | <0.01 | 0.62  | 0.01  | 0.07  | <0.01 |
| P       | 0.12  | 0.24 | 0.74  | 0.87  | 0.92  | 0.49  | 0.17  | 0.04  | 0.92  |
| Cu      | 0.01  | 0.57 | <0.01 | 0.67  | <0.01 | 0.96  | 0.03  | <0.01 | <0.01 |
| Zn      | 1.00  | 0.99 | <0.01 | 0.52  | <0.01 | 0.34  | <0.01 | 0.18  | <0.01 |
| Mo      | 0.99  | 1.00 | 0.65  | 0.93  | 0.32  | 0.26  | 0.33  | 0.92  | 0.04  |
| Co      | <0.01 | 0.65 | 1.00  | 0.31  | <0.01 | 0.50  | 0.01  | 0.19  | <0.01 |
| Ba      | 0.52  | 0.93 | 0.31  | 1.00  | 0.27  | <0.01 | 0.07  | 0.04  | 0.37  |
| Cr      | <0.01 | 0.32 | <0.01 | 0.27  | 1.00  | 0.26  | 0.04  | 0.15  | <0.01 |
| Pb      | 0.34  | 0.26 | 0.50  | <0.01 | 0.26  | 1.00  | 0.01  | 0.11  | 0.75  |
| Cd      | <0.01 | 0.33 | 0.01  | 0.07  | 0.04  | 0.01  | 1.00  | 0.02  | 0.01  |
| pH      | 0.18  | 0.92 | 0.19  | 0.04  | 0.15  | 0.11  | 0.02  | 1.00  | 0.09  |
| OM      | <0.01 | 0.04 | <0.01 | 0.37  | <0.01 | 0.75  | 0.01  | 0.09  | 1.00  |
